# Supplementary material for: Organocatalytic and direct asymmetric vinylogous Michael addition of α,α-dicyanoolefins to α,β-unsaturated aldehydes
Source: Royal Society of Chemistry journal article supplement (doi:10.1039/b600647g), 2006-01-01
Supplement: b600647g-1.pdf [file b600647g-1.pdf]

# Organocatalytic and Direct Asymmetric Vinylogous Michael Addition of $\alpha, \alpha$ -dicyanoolefins to $\alpha, \beta$ - Unsaturated Aldehydes

Jian-Wu Xie,<sup>b,c</sup> Lei Yue,<sup>a</sup> Dong Xue,<sup>b</sup> Xiao-Li Ma,<sup>a</sup> Ying-Chun Chen,<sup>\* a</sup>

Yong Wu,<sup>a</sup> Jin Zhu<sup>b</sup> and Jin-Gen Deng<sup>\* b</sup>

<sup>a</sup> Key Laboratory of Drug-Targeting of Education Ministry and Department of Medicinal Chemistry, West China School of Pharmacy, Sichuan University, Chengdu 61004, <sup>b</sup> Key Laboratory of Asymmetric Synthesis & Chirotechnology of Sichuan Province and Union Laboratory of Asymmetric Synthesis, Chengdu Institute of Organic Chemistry, Chinese Academy of Sciences, Chengdu 610041, <sup>c</sup> Graduated School of Chinese Academy of Sciences, Beijing, China

E-mail: ycchenhuaxi@yahoo.com.cn; jgdeng@cioc.ac.cn

## Supplementary Information

|                                                                                                                    |         |
|--------------------------------------------------------------------------------------------------------------------|---------|
| 1. General methods.....                                                                                            | S2      |
| 2. Optimizing reaction conditions for the vinylogous Michael reactions ...                                         | S2-S3   |
| 3. Spectra data of Michael addition products.....                                                                  | S3-S10  |
| 4. Spectra data of derived products.....                                                                           | S10-S11 |
| 5. Preliminary calculation (PM3) study on the iminium transitional state of catalyst 1e and crotonaldehyde 3a..... | S12     |
| 6. X-ray data of enantiopure 4aa, 4ca and racemic 5a.....                                                          | S12-36  |

## 1. General Methods:

NMR spectra were recorded with tetramethylsilane as the internal standard. Column chromatography was performed using silica gel (200-300 mesh) eluting with ethyl acetate and petroleum ether. Optical rotations were measured at 589 nm at 25°C. TLC was performed on glass-backed silica plates. Enantiomeric excess was determined by HPLC analysis on Chiralpak AS and OD columns. Commercial grade solvents were dried and purified by standard procedures as specified in Purification of Laboratory Chemicals, 4th Ed (Armarego, W. L. F.; Perrin, D. D. Butterworth Heinemann: 1997).

Catalysts **1b**, **1d** and **1f** were commercially available and used as received. Catalysts **1c**, **1e** and **1g-1k** were prepared according to literature procedures.<sup>1</sup>

## Reference:

1. C.-Y. Ho, Y.-C. Chen, M.-K. Wong and D. Yang, *J. Org. Chem.*, 2005, **70**, 898.

## 2. Screening of reaction conditions for the organocatalytic vinylogous Michael addition of $\alpha,\alpha$ -dicyanoolefin **2a** to crotonaldehyde **3a**

### 2.1 Effects of Acid additives on the vinylogous Michael addition<sup>a</sup>

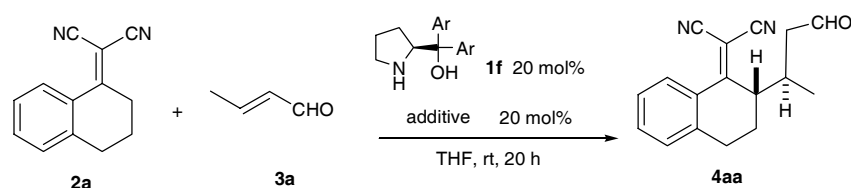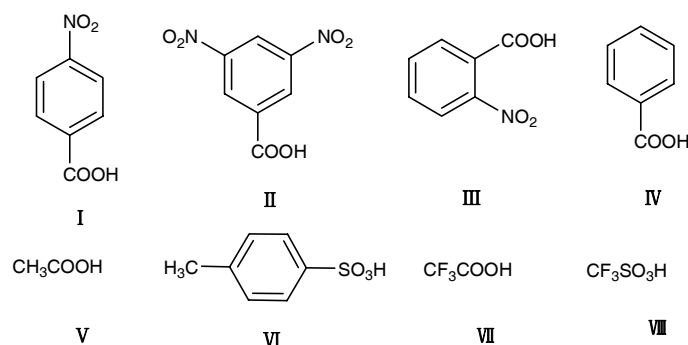

| entry | additive | yield <sup>b</sup> (%) | ee <sup>c</sup> (%) |
|-------|----------|------------------------|---------------------|
| 1     | I        | 89                     | 85.0                |
| 2     | II       | 85                     | 85.3                |
| 3     | III      | 83                     | 84.4                |
| 4     | IV       | 50                     | 80.0                |
| 5     | V        | 50                     | 75.3                |
| 6     | VI       | 30                     | 85.1                |
| 7     | VII      | 65                     | 83.0                |
| 8     | VIII     | 15                     | 76.8                |

<sup>a</sup> Reactions performed with 0.1 mmol **2a**. Method: 2.0 equiv. **3a**, **1f** (20 mol%), additive (20 mol%), in 1 mL THF at room temperature for 20 h. <sup>b</sup> Isolated yield. <sup>c</sup> Determined by chiral HPLC analysis.

## 2.2 Effects of solvent on the vinylogous Michael reaction<sup>a</sup>

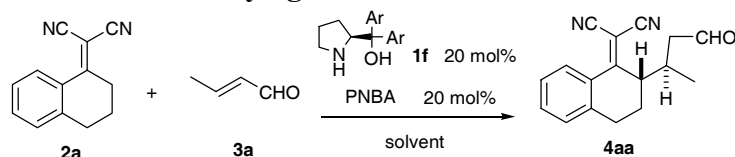

| entry    | solvent            | cat. (mol %)/t (h) | T (°C)     | yield <sup>b</sup> (%) | ee <sup>c</sup> (%) |
|----------|--------------------|--------------------|------------|------------------------|---------------------|
| 1        | THF                | 20/20              | rt         | 89                     | 85.0                |
| 2        | DCM                | 20/20              | rt         | 69                     | 77.3                |
| 3        | Et <sub>2</sub> O  | 20/20              | rt         | 66                     | 78.0                |
| 4        | toluene            | 20/20              | rt         | 67                     | 83.1                |
| 5        | MeOBu <sup>t</sup> | 20/20              | rt         | 91                     | 85.4                |
| 6        | CH <sub>3</sub> CN | 20/20              | rt         | 89                     | 84.3                |
| 7        | MeOH               | 20/20              | rt         | No Reaction            | -                   |
| <b>8</b> | <b>THF</b>         | <b>20/96</b>       | <b>-50</b> | <b>61</b>              | <b>94.6</b>         |
| 9        | MeOBu <sup>t</sup> | 20/96              | -50        | 28                     | 94.0                |
| 10       | THF                | 30/96              | -50        | 51                     | 94.5                |

<sup>a</sup> Reactions performed with 0.1 mmol **2a**. Method: 2.0 equiv. **3a**, in 1 mL solvent. <sup>b</sup> Isolated yield. <sup>c</sup> Determined by chiral HPLC analysis.

## 3. Spectra data of Michael addition products

**General procedure for the vinylogous Michael addition:** 19.2 mg (0.1 mmol) **2a**, 32  $\mu$ L **3a** (0.2 mmol), **1f** 5.1mg (0.02 mol) and PNBA 3.4mg (0.02 mol) were stirred in 1mL THF at  $-50$  °C for 96 h. Then the reaction was quenched by adding 0.5 mL 1M HCl. The mixture was extracted with EtOAc, dried with anhydrous sodium sulfate. The solvent was removed and flash chromatography on silica gel (10% ethyl acetate/petroleum ether) gave **4aa** as a white solid (16 mg, 61%). The structure of enantiopure **4aa** was confirmed by X-ray analysis.

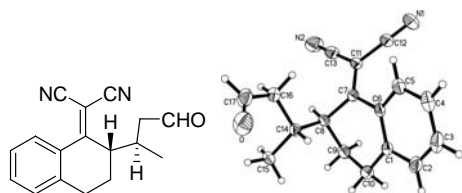

**4aa**, 61% yield. <sup>1</sup>H NMR (300 MHz, CDCl<sub>3</sub>)  $\delta$  (ppm) 9.63 (s, 1H), 7.93 (d,  $J = 7.9$  Hz, 1H), 7.50 (t,  $J = 7.5$  Hz, 1H), 7.36-7.26 (m, 2H), 3.13-3.10 (m, 1H), 2.90-2.88 (m, 2H), 2.41-2.34 (m, 2H), 2.29-2.10 (m, 3H), 1.04 (d,  $J = 6.5$  Hz, 3H); <sup>13</sup>C NMR (75 MHz, CDCl<sub>3</sub>)  $\delta$  (ppm) 200.3, 177.3, 140.1, 133.6, 129.4, 129.1, 128.2, 126.9, 113.4, 113.2, 80.7, 48.5, 47.0, 28.7, 24.8, 24.4, 17.2; IR (KBr) 2977, 2847, 2227, 1716, 1599, 1572, 1555, 775, 742 cm<sup>-1</sup>; ESI-HRMS: calcd. for C<sub>17</sub>H<sub>16</sub>N<sub>2</sub>O+Na 287.1155, found 287.1157;  $[\alpha]_D^{25} = -371.3$  (C 0.16, CH<sub>2</sub>Cl<sub>2</sub>), 95% ee; The enantiomeric ratio was determined by HPLC on Chiralpak AS column (30% 2-propanol/hexane, 1 mL/min),  $t_{\text{minor}} = 12.840$  min,  $t_{\text{major}} = 17.315$  min.

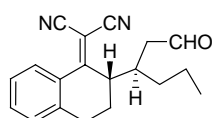

**4ab**, 58% yield. <sup>1</sup>H NMR (300 MHz, CDCl<sub>3</sub>)  $\delta$  (ppm) 9.60 (s, 1H),

7.89 (d,  $J = 7.9$  Hz, 1H), 7.50 (t,  $J = 7.5$  Hz, 1H), 7.36-7.26 (m, 2H), 3.27-3.23 (m, 1H), 3.20-2.69 (m, 2H), 2.48-2.47 (m, 1H), 2.29-2.14 (m, 4H), 1.41-1.32 (m, 4H), 0.89 (t,  $J = 6.9$  Hz, 3H);  $^{13}\text{C}$  NMR (75 MHz,  $\text{CDCl}_3$ )  $\delta$  (ppm) 200.5, 177.5, 140.1, 133.6, 129.4, 129.3, 128.4, 126.9, 113.4, 113.2, 81.0, 45.9, 45.3, 33.2, 32.9, 25.1, 24.5, 18.8, 14.2; ESI-HRMS: calcd. for  $\text{C}_{19}\text{H}_{20}\text{N}_2\text{O}+\text{Na}$  315.1468, found 315.1463; IR (film) 2958, 2933, 2872, 2726, 2225, 1722, 1651, 1601, 1572, 1553, 772, 737  $\text{cm}^{-1}$ ;  $[\alpha]_{\text{D}}^{25} = -201.2$  (C 0.08,  $\text{CH}_2\text{Cl}_2$ ), 94% ee; The enantiomeric excess was determined by HPLC on Chiralpak AS column (30% 2-propanol/hexane, 1 mL/min),  $t_{\text{minor}} = 10.615$  min,  $t_{\text{major}} = 12.815$  min.

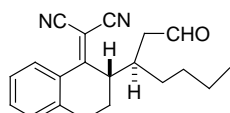

**4ac**, 51% yield.  $^1\text{H}$  NMR (300 MHz,  $\text{CDCl}_3$ )  $\delta$  (ppm) 9.60 (s, 1H), 7.90 (d,  $J = 7.8$  Hz, 1H), 7.50 (t,  $J = 7.5$  Hz, 1H), 7.36-7.26 (m, 2H), 3.27-3.23 (m, 1H), 2.90-2.71 (m, 2H), 2.50-2.40 (m, 1H), 2.48-2.14 (m, 4H), 1.44-1.25 (m, 6H), 0.88 (t,  $J = 6.8$  Hz, 3H);  $^{13}\text{C}$  NMR (75 MHz,  $\text{CDCl}_3$ )  $\delta$  (ppm) 200.5, 177.5, 140.1, 133.6, 129.4, 129.3, 128.4, 126.9, 113.4, 113.2, 80.9, 45.9, 45.2, 33.2, 30.3, 27.6, 25.1, 24.5, 22.9, 13.8; IR (film) 2931, 2870, 2225, 1723, 1601, 1572, 1553, 772, 736  $\text{cm}^{-1}$ ; ESI-HRMS: calcd. for  $\text{C}_{20}\text{H}_{22}\text{N}_2\text{O}-\text{H}$  305.1648, found 305.1665;  $[\alpha]_{\text{D}}^{25} = -254.2$  (C 0.12,  $\text{CH}_2\text{Cl}_2$ ), 93% ee; The enantiomeric excess was determined by HPLC on Chiralpak AS column (30% 2-PrOH/hexane, 1 mL/min),  $t_{\text{minor}} = 9.740$  min,  $t_{\text{major}} = 11.523$  min.

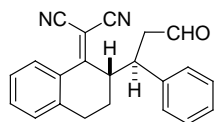

**4ad**, 80% yield.  $^1\text{H}$  NMR (300 MHz,  $\text{CDCl}_3$ )  $\delta$  (ppm) 9.40 (s, 1H), 8.03 (d,  $J = 7.9$  Hz, 1H), 7.53 (t,  $J = 7.5$  Hz, 1H), 7.40-7.26 (m, 7H), 3.59-3.55 (m, 1H), 3.18-3.16 (m, 1H), 3.16-2.86 (m, 3H), 2.58-2.50 (m, 1H), 2.58-2.51 (m, 1H), 1.80-1.77 (m, 2H);  $^{13}\text{C}$  NMR (75 MHz,  $\text{CDCl}_3$ )  $\delta$  (ppm) 199.5, 176.4, 139.9, 139.8, 134.1, 129.9, 129.2, 128.7, 128.3, 127.8, 127.0, 113.4, 80.7, 48.0, 47.2, 40.4, 25.2, 24.2; IR (KBr) 2953, 2886, 2842, 2689, 2214, 1753, 1652, 1528, 1449, 1423, 1318, 1215, 755, 743  $\text{cm}^{-1}$ ; ESI-HRMS: calcd. for  $\text{C}_{22}\text{H}_{18}\text{N}_2\text{O}-\text{H}$  325.1335, found 325.1335;  $[\alpha]_{\text{D}}^{25} = -173.3$  (C 0.12,  $\text{CH}_2\text{Cl}_2$ ), 89% ee; The enantiomeric excess was determined by HPLC on Chiralpak AS column (30% 2-propanol/hexane, 1 mL/min),  $t_{\text{major}} = 16.634$  min,  $t_{\text{minor}} = 24.687$  min.

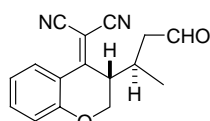

**4ba**, 83% yield.  $^1\text{H}$  NMR (300 MHz,  $\text{CDCl}_3$ )  $\delta$  (ppm) 9.63 (s, 1H), 8.13 (d,  $J = 8.2$  Hz, 1H), 7.51 (t,  $J = 8.4$  Hz, 1H), 7.05 (t,  $J = 8.2$  Hz, 1H), 6.96 (d,  $J = 8.4$  Hz, 1H), 4.67 (dd,  $J = 1.6, 12.6$  Hz, 1H), 4.26 (dd,  $J = 2.3, 12.6$  Hz, 1H), 2.85 (d,  $J = 9.8$  Hz, 1H), 2.49-2.35 (m, 3H), 1.19 (d,  $J = 6.4$  Hz, 3H);  $^{13}\text{C}$  NMR (75 MHz,

CDCl<sub>3</sub>)  $\delta$  (ppm) 199.9, 167.9, 156.1, 136.8, 127.7, 121.7, 118.0, 115.6, 113.2, 78.4, 66.2, 47.9, 44.4, 27.7, 17.8; IR (KBr) 2986, 2916, 2226, 1713, 1603, 1571, 1561, 1259, 1216, 771 cm<sup>-1</sup>; ESI-HRMS: calcd. for C<sub>16</sub>H<sub>14</sub>N<sub>2</sub>O<sub>2</sub>+Na 289.0947, found 289.0954;  $[\alpha]^{25}_D = -492.5$  (C 0.16, CH<sub>2</sub>Cl<sub>2</sub>), 95% ee; The enantiomeric excess was determined by HPLC on Chiralpak AS column (35% 2-propanol/hexane, 1 mL/min),  $t_{\text{minor}} = 13.298$  min,  $t_{\text{major}} = 17.832$  min.

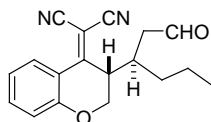

**4bb**, 78% yield. <sup>1</sup>H NMR (300 MHz, CDCl<sub>3</sub>)  $\delta$  (ppm) 9.57 (s, 1H),

8.10 (d,  $J = 8.2$  Hz, 1H), 7.51 (t,  $J = 8.4$  Hz, 1H), 7.05 (t,  $J = 8.2$  Hz, 1H), 6.96 (d,  $J = 8.4$  Hz, 1H), 4.65 (d,  $J = 12.6$  Hz, 1H), 4.24 (dd,  $J = 2.2, 12.6$  Hz, 1H), 3.00 (d,  $J = 9.8$  Hz, 1H), 2.52-2.32 (m, 3H), 1.61-1.54 (m, 2H), 1.34-1.29 (m, 2H), 0.93 (t,  $J = 7.3$  Hz, 3H); <sup>13</sup>C NMR (75 MHz, CDCl<sub>3</sub>)  $\delta$  (ppm) 199.9, 168.1, 156.2, 136.8, 127.9, 121.8, 118.0, 115.8, 113.2, 78.6, 66.4, 45.3, 42.7, 33.4, 31.8, 18.8, 14.2; IR (film) 2959, 2933, 2873, 2831, 2224, 1722, 1606, 1572, 1555, 1479, 1466, 1327, 1260, 1217, 769, 749 cm<sup>-1</sup>; ESI-HRMS: calcd. for C<sub>18</sub>H<sub>18</sub>N<sub>2</sub>O<sub>2</sub>-H 293.1285, found 293.1299;  $[\alpha]^{25}_D = -402.5$  (C 0.2, CH<sub>2</sub>Cl<sub>2</sub>), 95% ee; The enantiomeric excess was determined by HPLC on Chiralpak AS column (30% 2-propanol/hexane, 1 mL/min),  $t_{\text{minor}} = 9.965$  min,  $t_{\text{major}} = 12.865$  min.

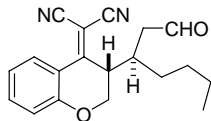

**4bc**, 80% yield. <sup>1</sup>H NMR (300 MHz, CDCl<sub>3</sub>)  $\delta$  (ppm) 9.58 (s, 1H),

8.10 (d,  $J = 8.2$  Hz, 1H), 7.51 (t,  $J = 7.3$  Hz, 1H), 7.06 (t,  $J = 7.8$  Hz, 1H), 6.96 (d,  $J = 8.4$  Hz, 1H), 4.65 (d,  $J = 12.0$  Hz, 1H), 4.25 (d,  $J = 12.2$  Hz, 1H), 2.99 (d,  $J = 10.1$  Hz, 1H), 2.60-2.50 (m, 1H), 2.37-2.31 (m, 2H), 1.67-1.57 (m, 2H), 1.29 (br.s, 4H), 0.88 (t,  $J = 8.8$  Hz, 3H); <sup>13</sup>C NMR (75 MHz, CDCl<sub>3</sub>)  $\delta$  (ppm) 199.9, 168.1, 156.1, 136.8, 127.9, 121.8, 118.0, 115.8, 113.2, 78.5, 66.4, 45.2, 42.6, 31.8, 30.8, 27.5, 22.8, 13.8; IR (film) 2938, 2870, 2826, 2225, 1717, 1608, 1570, 1551, 1254, 1216, 775, 745 cm<sup>-1</sup>; ESI-HRMS: calcd. for C<sub>19</sub>H<sub>20</sub>N<sub>2</sub>O<sub>2</sub>-H 307.1441, found 307.1426;  $[\alpha]^{25}_D = -398.0$  (C 0.16, CH<sub>2</sub>Cl<sub>2</sub>), 94% ee; The enantiomeric excess was determined by HPLC on Chiralpak AS column (30% 2-propanol/hexane, 1 mL/min),  $t_{\text{minor}} = 9.515$  min,  $t_{\text{major}} = 11.382$  min.

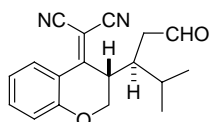

**4be**, 69% yield. <sup>1</sup>H NMR (300 MHz, CDCl<sub>3</sub>)  $\delta$  (ppm) 9.42 (s, 1H),

8.02 (d,  $J = 8.1$  Hz, 1H), 7.51 (t,  $J = 7.2$  Hz, 1H), 7.05 (t,  $J = 8.1$  Hz, 1H), 6.96 (d,  $J = 8.4$  Hz, 1H), 4.66 (dd,  $J = 1.5, 12.6$  Hz, 1H), 4.22 (dd,  $J = 2.2, 12.6$  Hz, 1H), 3.00 (d,  $J = 10.0$  Hz, 1H), 2.48-2.17 (m, 4H), 0.95-0.91 (m, 6H); <sup>13</sup>C NMR (75 MHz, CDCl<sub>3</sub>)

$\delta$  (ppm) 199.9, 168.2, 156.1, 136.7, 128.3, 121.7, 117.8, 115.9, 113.2, 113.1, 78.5, 66.3, 42.0, 41.4, 36.1, 27.7, 21.2, 15.8; IR (film) 2963, 2935, 2879, 2224, 1722, 1607, 1572, 1260, 1218, 767, 733  $\text{cm}^{-1}$ ; ESI-HRMS: calcd. for  $\text{C}_{18}\text{H}_{18}\text{N}_2\text{O}_2\text{-H}$  293.1285, found 293.1271;  $[\alpha]_{\text{D}}^{25} = -276.7$  (C 0.12,  $\text{CH}_2\text{Cl}_2$ ), 98% ee; The enantiomeric excess was determined by HPLC on Chiralpak AS column (30% 2-propanol/hexane, 1 mL/min),  $t_{\text{minor}} = 9.982$  min,  $t_{\text{major}} = 12.598$  min.

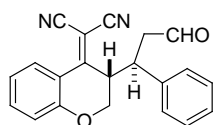

**4bd**, 83% yield.  $^1\text{H}$  NMR (300 MHz,  $\text{CDCl}_3$ )  $\delta$  (ppm) 9.47 (s, 1H),

8.24 (d,  $J = 8.2$  Hz, 1H), 7.62-7.57 (m, 1H), 7.45-7.40 (m, 2H), 7.37-7.31 (m, 3H), 7.14 (t,  $J = 8.2$  Hz, 1H), 7.06 (d,  $J = 8.4$  Hz, 1H), 4.11-4.09 (m, 2H), 3.46-3.44 (m, 1H), 3.28-3.22 (m, 1H), 3.17-3.07 (m, 1H), 2.69-2.61 (m, 1H);  $^{13}\text{C}$  NMR (75 MHz,  $\text{CDCl}_3$ )  $\delta$  (ppm) 199.2, 167.0, 156.2, 139.2, 137.2, 129.3, 128.1, 127.9, 122.0, 118.3, 115.2, 113.4, 113.1, 78.6, 66.5, 46.7, 45.1, 39.5; IR (KBr) 2946, 2887, 2832, 2732, 2223, 1718, 1610, 1548, 1478, 1452, 1329, 1216, 766, 742  $\text{cm}^{-1}$ ; ESI-HRMS: calcd. for  $\text{C}_{21}\text{H}_{16}\text{N}_2\text{O}_2\text{+Na}$  351.1104, found 351.1107;  $[\alpha]_{\text{D}}^{25} = -224.5$  (C 0.2,  $\text{CH}_2\text{Cl}_2$ ), 92% ee; The enantiomeric excess was determined by HPLC on Chiralpak AS column (30% 2-propanol/hexane, 1 mL/min),  $t_{\text{minor}} = 15.190$  min,  $t_{\text{major}} = 17.223$  min.

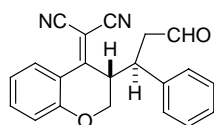

**4bf**, 60% yield.  $^1\text{H}$  NMR (300 MHz,  $\text{CDCl}_3$ )  $\delta$  (ppm) 9.46 (s,

1H), 8.21 (d,  $J = 8.2$  Hz, 1H), 7.57 (t,  $J = 8.5$  Hz, 1H), 7.37 (d,  $J = 8.5$  Hz, 2H), 7.26 (d,  $J = 8.4$  Hz, 2H), 7.11 (t,  $J = 8.2$  Hz, 1H), 7.03 (d,  $J = 8.5$  Hz, 1H), 4.13-4.00 (m, 2H), 3.42-3.38 (m, 1H), 3.20-3.03 (m, 2H), 2.67-2.60 (m, 1H);  $^{13}\text{C}$  NMR (75 MHz,  $\text{CDCl}_3$ )  $\delta$  (ppm) 198.6, 166.7, 156.1, 137.8, 137.3, 133.9, 129.5, 127.9, 122.1, 118.3, 115.1, 113.4, 113.0, 78.7, 66.4, 46.7, 44.9, 38.7; IR (KBr) 2916, 2880, 2772, 2763, 2218, 1716, 1609, 1550, 1455, 1450, 1328, 1205, 769, 732  $\text{cm}^{-1}$ ; ESI-HRMS: calcd. for  $\text{C}_{21}\text{H}_{15}\text{N}_2\text{O}_2\text{Cl-H}$  361.0738, found 361.0751;  $[\alpha]_{\text{D}}^{25} = -58.8$  (C 0.24,  $\text{CH}_2\text{Cl}_2$ ), 90% ee; The enantiomeric excess was determined by HPLC on Chiralpak AS column (30% 2-propanol/hexane, 1 mL/min),  $t_{\text{minor}} = 16.248$  min,  $t_{\text{major}} = 18.115$  min.

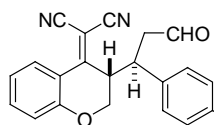

**4bg**, 63% yield.  $^1\text{H}$  NMR (300 MHz,  $\text{CDCl}_3$ )  $\delta$  (ppm) 9.44 (s,

1H), 8.20 (d,  $J = 8.2$  Hz, 1H), 7.57 (t,  $J = 7.1$  Hz, 1H), 7.23 (d,  $J = 8.7$  Hz, 2H), 7.11 (t,  $J = 7.1$  Hz, 1H), 7.03 (d,  $J = 8.4$  Hz, 1H), 6.92 (d,  $J = 6.7$  Hz, 2H), 4.08 (d,  $J = 1.9$  Hz, 2H), 3.81 (s, 3H), 3.38-3.36 (m, 1H), 3.20-3.15 (m, 1H), 3.09-3.03 (m, 1H), 2.62-2.56 (m, 1H);  $^{13}\text{C}$  NMR (75 MHz,  $\text{CDCl}_3$ )  $\delta$  (ppm) 199.4, 167.2, 159.2, 156.2, 137.2, 130.9, 129.2, 127.9, 122.0, 118.3, 115.2, 114.7, 113.4, 113.2, 78.5, 66.5, 55.3, 46.8, 45.4,



1.32-1.26 (m, 2H), 0.92 (t,  $J = 7.1$  Hz, 3H);  $^{13}\text{C}$  NMR (75 MHz,  $\text{CDCl}_3$ )  $\delta$  (ppm) 199.9, 173.4, 138.1, 133.7, 130.3, 127.0, 125.8, 124.9, 113.0, 112.5, 82.7, 45.2, 42.1, 33.0, 31.9, 29.6, 28.5, 18.7, 14.2; IR (film) 2958, 2931, 2225, 1722, 1588, 1562, 769,  $735\text{ cm}^{-1}$ ; ESI-HRMS: calcd. for  $\text{C}_{18}\text{H}_{18}\text{N}_2\text{OS-H}$  309.1056, found 309.1066;  $[\alpha]_{\text{D}}^{25} = -499.5$  (C 0.22,  $\text{CH}_2\text{Cl}_2$ ), 93% ee; The enantiomeric excess was determined by HPLC on Chiralpak AS column (30% 2-propanol/hexane, 1 mL/min),  $t_{\text{minor}} = 12.532$  min,  $t_{\text{major}} = 18.432$  min.

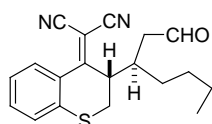

**4cc**, 71% yield.  $^1\text{H}$  NMR (300 MHz,  $\text{CDCl}_3$ )  $\delta$  (ppm) 9.54 (s, 1H),

7.78 (d,  $J = 7.7$  Hz, 1H), 7.40 (t,  $J = 8.0$  Hz, 1H), 7.26-7.17 (m, 2H), 3.46-3.41 (m, 2H), 3.23-3.20 (m, 1H), 2.46-2.41 (m, 2H), 2.24-2.23 (m, 1H), 1.60-1.56 (m, 1H), 1.33-1.25 (m, 4H), 0.90 (t,  $J = 7.1$  Hz, 3H);  $^{13}\text{C}$  NMR (75 MHz,  $\text{CDCl}_3$ )  $\delta$  (ppm) 199.9, 173.4, 138.1, 133.7, 130.4, 127.1, 125.8, 124.9, 113.0, 112.5, 82.7, 45.1, 42.0, 31.9, 30.4, 28.5, 27.5, 22.8, 13.9; IR (film) 2936, 2843, 2210, 1734, 1609, 1532, 1455, 795,  $762\text{ cm}^{-1}$ ; ESI-HRMS: calcd. for  $\text{C}_{19}\text{H}_{20}\text{N}_2\text{OS-H}$  323.1213, found 323.1230;  $[\alpha]_{\text{D}}^{25} = -643.5$  (C 0.2,  $\text{CH}_2\text{Cl}_2$ ), 92% ee; The enantiomeric excess was determined by HPLC on Chiralpak AS column (30% 2-propanol/hexane, 1 mL/min),  $t_{\text{minor}} = 11.415$  min,  $t_{\text{major}} = 16.257$  min.

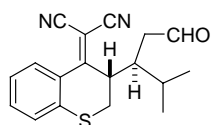

**4ce**, 55% yield.  $^1\text{H}$  NMR (300 MHz,  $\text{CDCl}_3$ )  $\delta$  (ppm) 9.35 (s, 1H),

7.75 (d,  $J = 7.8$  Hz, 1H), 7.40 (t,  $J = 7.1$  Hz, 1H), 7.26-7.16 (m, 2H), 3.48-3.36 (m, 2H), 3.23-3.18 (m, 1H), 2.49-2.43 (m, 2H), 2.16-2.09 (m, 2H), 0.91 (d,  $J = 6.8$  Hz, 6H);  $^{13}\text{C}$  NMR (75 MHz,  $\text{CDCl}_3$ )  $\delta$  (ppm) 199.9, 173.0, 138.0, 133.8, 131.0, 126.9, 125.6, 124.7, 113.0, 112.7, 82.5, 41.8, 41.2, 35.9, 28.6, 27.6, 21.4, 15.5; IR (film) 2960, 2933, 2225, 1721, 1588, 1561, 1547, 910,  $734\text{ cm}^{-1}$ ; ESI-HRMS: calcd. for  $\text{C}_{18}\text{H}_{18}\text{N}_2\text{S-H}$  309.1056, found 309.1059;  $[\alpha]_{\text{D}}^{25} = -318.3$  (C 0.16,  $\text{CH}_2\text{Cl}_2$ ), 94% ee; The enantiomeric excess was determined by HPLC on Chiralpak AS column (30% 2-propanol/hexane, 1 mL/min),  $t_{\text{minor}} = 11.557$  min,  $t_{\text{major}} = 15.740$  min.

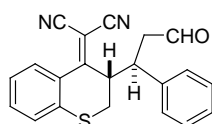

**4cd**, 90% yield.  $^1\text{H}$  NMR (300 MHz,  $\text{CDCl}_3$ )  $\delta$  (ppm) 9.36 (s, 1H),

7.91 (d,  $J = 8.0$  Hz, 1H), 7.46-7.43 (m, 1H), 7.38-7.20 (m, 7H), 3.67-3.62 (m, 1H), 3.51-3.50 (m, 1H), 3.28 (dd,  $J = 3.3, 13.9$  Hz, 1H), 2.97-2.96 (m, 1H), 2.62 (dd,  $J = 3.2, 13.9$  Hz, 1H), 2.46 (dd,  $J = 1.1, 4.2$  Hz, 1H);  $^{13}\text{C}$  NMR (75 MHz,  $\text{CDCl}_3$ )  $\delta$  (ppm) 199.1, 172.1, 138.9, 138.3, 134.1, 130.4, 129.2, 128.1, 127.9, 127.2, 125.0, 124.7, 113.0, 112.8, 82.7, 46.9, 44.0, 39.3, 28.6; IR (KBr) 2938, 2879, 2846, 2698, 2213,



1736, 1620, 1543, 1472, 1446, 1326, 1219, 769, 517  $\text{cm}^{-1}$ ; ESI-HRMS: calcd. for  $\text{C}_{21}\text{H}_{16}\text{N}_2\text{OS}\cdot\text{H}$  343.0900, found 343.0896;  $[\alpha]_{\text{D}}^{25} = -871.7$  (C 0.12,  $\text{CH}_2\text{Cl}_2$ ), 86% ee; The enantiomeric excess was determined by HPLC on Chiralpak AS column (30% 2-propanol/hexane, 1 mL/min),  $t_{\text{minor}} = 18.465$  min,  $t_{\text{major}} = 22.332$  min.

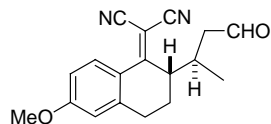

**4da**, 48% yield.  $^1\text{H}$  NMR (300 MHz,  $\text{CDCl}_3$ )  $\delta$  (ppm) 9.63 (s, 1H), 7.98 (d,  $J = 8.9$  Hz, 1H), 6.84 (d,  $J = 8.9$  Hz, 1H), 6.74 (d,  $J = 2.6$  Hz, 1H), 3.86 (s, 3H), 3.06-2.87 (m, 3H), 2.42-2.07 (m, 5H), 1.05 (d,  $J = 6.5$  Hz, 3H);  $^{13}\text{C}$  NMR (75 MHz,  $\text{CDCl}_3$ )  $\delta$  (ppm) 200.5, 176.3, 163.9, 142.7, 130.5, 121.9, 114.3, 114.1, 113.9, 113.0, 77.7, 55.5, 48.6, 46.9, 28.6, 25.0, 24.4, 17.4; IR (KBr) 2935, 2879, 2746, 2223, 1718, 1605, 1568, 1561, 1546, 1496, 1279, 1243, 822  $\text{cm}^{-1}$ ; ESI-HRMS: calcd. for  $\text{C}_{18}\text{H}_{18}\text{N}_2\text{O}_2+\text{Na}$  317.1260, found 317.1273;  $[\alpha]_{\text{D}}^{25} = -180.0$  (C 0.06,  $\text{CH}_2\text{Cl}_2$ ), 95% ee; The enantiomeric excess was determined by HPLC on Chiralpak AS column (35% 2-propanol/hexane, 1 mL/min),  $t_{\text{minor}} = 16.640$  min,  $t_{\text{major}} = 20.798$  min.

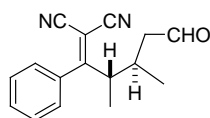

**4ea**, 40 % yield.  $^1\text{H}$  NMR (300 MHz,  $\text{CDCl}_3$ )  $\delta$  (ppm) 9.69 (s, 1H), 7.50-7.48 (m, 3H), 7.23-7.20 (m, 2H), 3.12-3.07 (m, 1H), 2.45-2.27 (m, 2H), 1.27 (d,  $J = 6.9$  Hz, 3H), 1.00 (d,  $J = 6.4$  Hz, 3H);  $^{13}\text{C}$  NMR (75 MHz,  $\text{CDCl}_3$ )  $\delta$  (ppm) 200.2, 184.2, 134.1, 131.0, 129.1, 126.9, 111.8, 88.0, 48.9, 47.0, 30.8, 29.6, 17.5, 16.7; IR (film) 2978, 2931, 2231, 1721, 1579, 1454  $\text{cm}^{-1}$ ; ESI-HRMS: calcd. for  $\text{C}_{16}\text{H}_{16}\text{N}_2\text{O}+\text{Na}$  275.1155, found 275.1166;  $[\alpha]_{\text{D}}^{25} = -13.3$  (C 0.1,  $\text{CH}_2\text{Cl}_2$ ), 88% ee; The enantiomeric ratio was determined by HPLC on Chiralpak OD column (10% 2-propanol/hexane, 1 mL/min) after converted to the alcohol,  $t_{\text{minor}} = 10.015$ ,  $t_{\text{major}} = 12.215$  min.

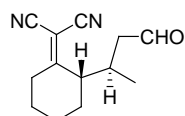

**4fa**, 57% yield.  $^1\text{H}$  NMR (300 MHz,  $\text{CDCl}_3$ )  $\delta$  (ppm) 9.74 (s, 1H), 2.92 (d,  $J = 13.9$  Hz, 1H), 2.40 (d,  $J = 17.7$  Hz, 1H), 2.36-2.33 (m, 1H), 2.28-2.26 (m, 2H), 2.22-2.20 (m, 3H), 1.65-1.52 (m, 4H), 1.08 (d,  $J = 6.4$  Hz, 3H);  $^{13}\text{C}$  NMR (75 MHz,  $\text{CDCl}_3$ )  $\delta$  (ppm) 199.2, 186.9, 110.6, 110.3, 82.8, 47.7, 47.7, 30.5, 28.8, 27.7, 27.0, 18.5, 16.9; IR (film) 2908, 2898, 1736, 1579, 1441  $\text{cm}^{-1}$ ; ESI-HRMS: calcd. for  $\text{C}_{13}\text{H}_{16}\text{N}_2\text{O}+\text{Na}$  239.1155, found 239.1203;  $[\alpha]_{\text{D}}^{25} = -20.6$  (C 0.32,  $\text{CH}_2\text{Cl}_2$ ), 82% ee; The enantiomeric ratio was determined by HPLC on Chiralcel OD column (5% 2-propanol/hexane, 1 mL/min) after converted to the alcohol,  $t_{\text{minor}} = 13.212$  min,  $t_{\text{major}} = 15.988$  min.

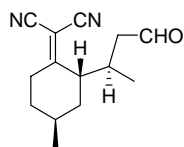

**4ga**, 49% yield.  $^1\text{H}$  NMR (300 MHz,  $\text{CDCl}_3$ )  $\delta$  (ppm) 9.74 (s, 1H) 2.89-2.88 (m, 1H), 2.80-2.72 (m, 1H), 2.51-2.34 (m, 4H), 2.29-2.09 (m, 3H), 1.25-1.23 (m, 2H), 1.08 (d,  $J = 6.4$  Hz, 3H), 0.92 (d,  $J = 6.5$  Hz, 3H); 2D NMR and NOESY study determined the *trans*-configuration in the cyclohexyl ring structure;  $^{13}\text{C}$  NMR (75 MHz,  $\text{CDCl}_3$ , DEPT)  $\delta$  (ppm) 200.2 (CH), 187.7 (C), 111.7 (CN), 111.3 (CN), 82.8 (C), 49.0 (CH), 48.8 ( $\text{CH}_2$ ), 37.9 ( $\text{CH}_2$ ), 36.5 ( $\text{CH}_2$ ), 31.5 ( $\text{CH}_2$ ), 28.6 (CH), 25.8 (CH), 21.0 ( $\text{CH}_3$ ), 18.0 ( $\text{CH}_3$ ); IR (film) 2953, 2928, 1723, 1589, 1456, 1456  $\text{cm}^{-1}$ ; ESI-HRMS: calcd. for  $\text{C}_{14}\text{H}_{18}\text{N}_2\text{O} + \text{Na}$  253.1311, found 253.1308;  $[\alpha]^{25}_{\text{D}} = -47.0$  (C 0.20,  $\text{CH}_2\text{Cl}_2$ ), 68% ee; The enantiomeric ratio was determined by HPLC on Chiralcel AS column (10% 2-propanol/hexane, 1 mL/min) after converted to the alcohol,  $t_{\text{minor}} = 7.373$  min,  $t_{\text{major}} = 8.163$  min.

#### 4. Spectra data of derived products

##### Intramolecular vinylogous aldol reaction

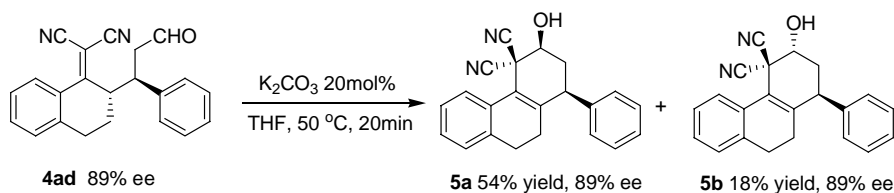

**4ad** 65.2 mg (0.2 mmol) and  $\text{K}_2\text{CO}_3$  5.5 mg (0.04 mmol) were stirred in 5 ml THF at 50  $^\circ\text{C}$  for 20 min. Then the solvent was removed and the residue was chromatographed on silica gel (10% ethyl acetate petroleum ether) to give pure **5a** 35.2 mg (54% yield) and **5b** 12 mg (18% yield).

The structure of racemic **5a** has been confirmed by X-ray analysis.  $^1\text{H}$  NMR (300 MHz,  $\text{CDCl}_3$ )  $\delta$  (ppm) 7.72 (d,  $J = 7.8$  Hz, 1H), 7.40-7.24 (m, 5H), 7.16-7.13 (m, 3H) 4.49-4.43 (m, 1H), 3.84-3.77 (m, 1H), 3.00 (d,  $J = 6.3$  Hz, 1H), 2.69-2.48 (m, 3H), 2.21-2.16 (m, 1H), 1.95- 1.90 (m, 2H);  $^{13}\text{C}$  NMR (75 MHz,  $\text{CDCl}_3$ )  $\delta$  (ppm) 143.9, 140.3, 135.8, 133.7, 130.7, 129.8, 129.0, 128.3, 127.7, 127.6, 126.7, 126.3, 123.3, 121.3, 115.3, 114.0, 72.6, 47.8, 37.0, 28.5, 27.6; IR (KBr) 3535, 2939, 2930, 1630, 1600, 1490, 1451, 1113, 1067  $\text{cm}^{-1}$ ; ESI-HRMS: calcd. for  $\text{C}_{22}\text{H}_{18}\text{N}_2\text{O} + \text{Na}$  349.1311, found 349.1314;  $[\alpha]^{25}_{\text{D}} = -29.0$  (C 0.10,  $\text{CH}_2\text{Cl}_2$ ), 89% ee; The enantiomeric ratio was determined by HPLC on Chiralpak OD column (30% 2-propanol/hexane, 1 mL/min),  $t_{\text{minor}} = 7.640$ ,  $t_{\text{major}} = 23.176$  min.

Compound **5b**:  $^1\text{H}$  NMR (300 MHz,  $\text{CDCl}_3$ )  $\delta$  (ppm) 7.01 (d,  $J = 7.8$  Hz, 1H), 7.39-7.21 (m, 5H), 7.14 (t,  $J = 6.5$  Hz, 1H), 4.49 (m, 1H), 3.84-3.78 (m, 1H), 3.00 (d,  $J = 5.9$  Hz, 1H), 2.69-2.50 (m, 3H), 2.21-2.17 (m, 1H), 1.95-1.90 (m, 2H); ESI-HRMS: calcd. for  $\text{C}_{22}\text{H}_{18}\text{N}_2\text{O} + \text{Na}$  349.1311, found 349.1314; The enantiomeric ratio (89% ee) was determined by HPLC on Chiralpak OD column (5% 2-propanol/hexane, 1 mL/min),  $t_{\text{minor}} = 42.061$ ,  $t_{\text{major}} = 48.746$

## Chemoselective reduction of Michael addition product **4ad**

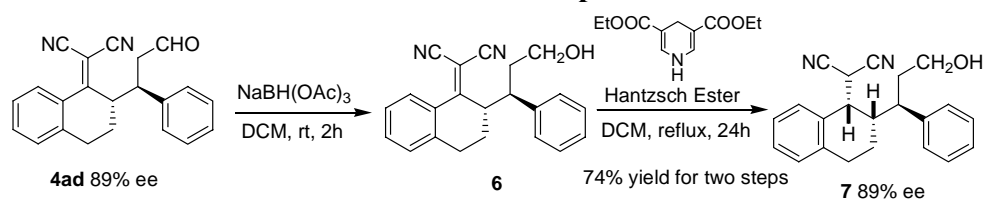

**4ad** 65.2mg (0.2 mmol) and NaBH(OAc)<sub>3</sub> 94mg (1 mmol) were stirred in 5ml DCM at room temperature for 2h. Then the mixture was washed with water, dried and concentrated. The residue was flash chromatographed on silica gel (20% ethyl acetate/petroleum ether) to give crude **6** (61mg, 98%) as white solid and direct used in the next step. <sup>1</sup>H NMR (300 MHz, CDCl<sub>3</sub>) δ (ppm) 8.05 (d, *J* = 7.9 Hz, 1H), 7.52 (t, *J* = 6.3 Hz, 1H), 7.38-7.22 (m, 7H), 3.59-3.54 (m, 1H), 3.41-3.35 (m, 1H), 2.85-2.83 (m, 2H), 2.72-2.71 (m, 1H), 1.93-1.88 (m, 2H), 1.75-1.67 (m, 3H); ESI-HRMS: calcd. for C<sub>22</sub>H<sub>20</sub>N<sub>2</sub>O+Na 351.1468, found 351.1466.

Compound **6** 49 mg (0.15 mmol) and Hantzsch ester 202 mg (0.9 mmol) were refluxed in 5ml DCM for 24h. Then the solvent was removed and the residue was chromatographed on silica gel (40% ethyl acetate/petroleum ether) to give **7** as a white solid, 36mg (75%). <sup>1</sup>H NMR (400 MHz, CDCl<sub>3</sub>) δ (ppm) 7.52 (d, *J* = 7.6 Hz, 1H), 7.40-7.19 (m, 8H), 4.44 (d, *J* = 2.0 Hz, 1H), 3.85 (br.s, 1H), 3.60-3.55 (m, 1H), 3.37-3.31 (m, 1H), 2.96 (dd, *J* = 6.8, 17.6 Hz, 1H), 2.84-2.78 (m, 1H), 2.76-2.66 (m, 1H), 2.32-2.25 (m, 2H), 2.19-2.12 (m, 1H), 1.85-1.69 (m, 2H), 1.57-1.47 (m, 1H); 2D NMR and NOESY study confirmed the *cis*-configuration in the ring structure; <sup>13</sup>C NMR (100 MHz, CDCl<sub>3</sub>, DEPT) δ (ppm) 142.2 (C), 136.9 (C), 133.1 (C), 129.6 (CH), 129.2 (CH), 128.8 (CH), 128.7 (CH), 128.1 (CH), 127.0 (CH), 126.1 (CH), 114.0 (CN), 112.3 (CN), 59.7 (CH<sub>2</sub>), 44.7 (CH), 42.5 (CH), 42.2 (CH), 35.6 (CH<sub>2</sub>), 27.9 (CH<sub>2</sub>), 24.4 (CH), 21.9 (CH<sub>2</sub>); ESI-HRMS: calcd. for C<sub>22</sub>H<sub>22</sub>N<sub>2</sub>O+Na 353.1624, found 353.1636; IR (KBr) 3381, 2936, 1601, 1493, 1453, 1040, 703 cm<sup>-1</sup>; [α]<sub>D</sub><sup>25</sup> = -47 (C 0.2, CH<sub>2</sub>Cl<sub>2</sub>), 89% ee; The enantiomeric ratio was determined by HPLC on Chiralpak AS column (5% 2-propanol/hexane, 1 ml/min), *t*<sub>minor</sub> = 29.343 min, *t*<sub>major</sub> = 36.390 min.

## 5. Preliminary calculation (PM3) study on the iminium transitional state of catalyst **1f** and crotonaldehyde **3a**

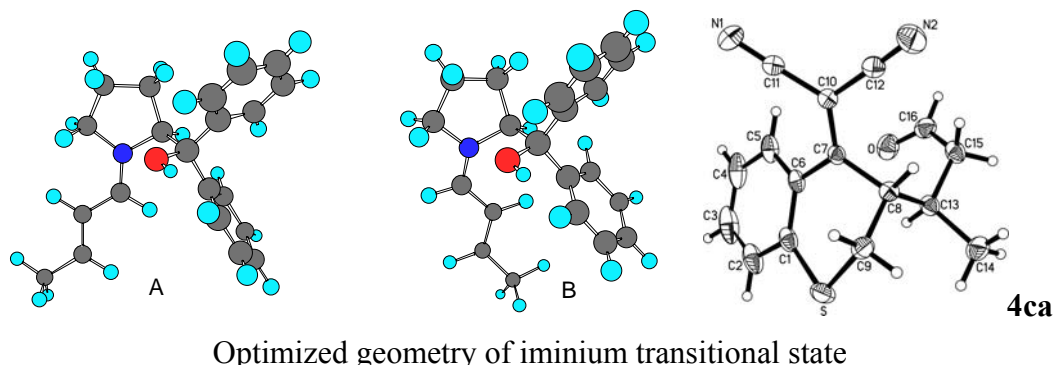

The activation of enal was proposed to be the formation of iminium salt of  $\alpha,\beta$ -unsaturated aldehyde and secondary amine catalyst as shown above. The geometry of possible transitional **A** and **B** was optimized using semi-empirical method (PM3) performed on the Gaussian 98. The energy of transitional **A** was 3.6 kcal/mol lower than that of transitional **B**, indicating transitional **A** would be the preferred one in the Michael addition reaction. Therefore, attacking the *Re*-face of the transitional **A** leads to the formation of (*R*)-configuration at the  $\beta$ -position of crotonaldehyde **3a**, which is in fine accordance with what was observed in the X-ray analysis of chiral product **4ca** bearing a sulfur atom (see C13 in **4ca**).

## 6. X-ray data of enantiopure **4aa**, **4ca** and racemic **5a**

### Crystal data and structure of enantiopure **4aa**

Table 1. Crystal data and structure refinement for **4aa**.

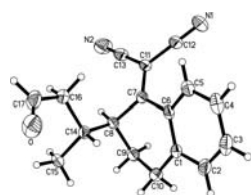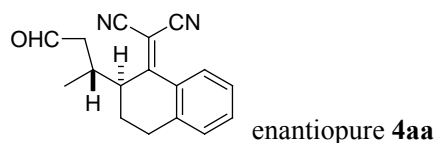

|                     |              |
|---------------------|--------------|
| Identification code | 4aa          |
| Empirical formula   | C17 H16 N2 O |
| Formula weight      | 264.32       |
| Temperature         | 296(2) K     |
| Wavelength          | 0.71073 Å    |

|                                   |                                                                                                              |
|-----------------------------------|--------------------------------------------------------------------------------------------------------------|
| Crystal system                    | Orthorhombic                                                                                                 |
| Space group                       | P2(1)2(1)2(1)                                                                                                |
| Unit cell dimensions              | a = 6.076(1) Å    alpha = 90 deg.<br>b = 13.777(3) Å    beta = 90 deg.<br>c = 17.439(3) Å    gamma = 90 deg. |
| Volume, Z                         | 1459.74(51) Å <sup>3</sup> , 4                                                                               |
| Density (calculated)              | 1.203 Mg/m <sup>3</sup>                                                                                      |
| Absorption coefficient            | 0.076 mm <sup>-1</sup>                                                                                       |
| F(000)                            | 560                                                                                                          |
| Crystal size                      | 0.52 x 0.32 x 0.18 mm                                                                                        |
| Theta range for data collection   | 1.88 to 27.00 deg.                                                                                           |
| Limiting indices                  | 0 ≤ h ≤ 7, 0 ≤ k ≤ 17, -1 ≤ l ≤ 22                                                                           |
| Reflections collected             | 2014                                                                                                         |
| Independent reflections           | 1903 [R(int) = 0.0093]                                                                                       |
| Absorption correction             | None                                                                                                         |
| Refinement method                 | Full-matrix least-squares on F <sup>2</sup>                                                                  |
| Data / restraints / parameters    | 1903 / 0 / 183                                                                                               |
| Goodness-of-fit on F <sup>2</sup> | 0.905                                                                                                        |
| Final R indices [I > 2σ(I)]       | R1 = 0.0377, wR2 = 0.0722                                                                                    |
| R indices (all data)              | R1 = 0.0663, wR2 = 0.0791                                                                                    |
| Absolute structure parameter      | -3(3)                                                                                                        |
| Extinction coefficient            | 0.039(2)                                                                                                     |
| Largest diff. peak and hole       | 0.112 and -0.116 e.Å <sup>-3</sup>                                                                           |

Table 2. Atomic coordinates ( $\times 10^4$ ) and equivalent isotropic displacement parameters ( $\text{\AA}^2 \times 10^3$ ) for 4aa.  $U(\text{eq})$  is defined as one third of the trace of the orthogonalized  $U_{ij}$  tensor.

|       | x        | y       | z       | $U(\text{eq})$ |
|-------|----------|---------|---------|----------------|
| O     | 10901(4) | 5384(2) | 3706(1) | 96(1)          |
| N(1)  | 5422(5)  | 2678(2) | 7038(1) | 90(1)          |
| N(2)  | 2025(4)  | 3162(2) | 4918(1) | 92(1)          |
| C(1)  | 7507(4)  | 6078(2) | 6477(1) | 50(1)          |
| C(2)  | 9051(5)  | 6431(2) | 6994(1) | 64(1)          |
| C(3)  | 10566(5) | 5837(2) | 7338(1) | 72(1)          |
| C(4)  | 10621(5) | 4865(2) | 7163(1) | 66(1)          |
| C(5)  | 9094(4)  | 4488(2) | 6664(1) | 54(1)          |
| C(6)  | 7496(4)  | 5075(1) | 6323(1) | 44(1)          |
| C(7)  | 5833(4)  | 4687(1) | 5793(1) | 42(1)          |
| C(8)  | 5084(4)  | 5373(1) | 5174(1) | 42(1)          |
| C(9)  | 4187(4)  | 6260(2) | 5606(1) | 56(1)          |
| C(10) | 5939(5)  | 6759(2) | 6087(1) | 64(1)          |
| C(11) | 4899(4)  | 3801(1) | 5872(1) | 47(1)          |
| C(12) | 5255(5)  | 3181(2) | 6523(1) | 61(1)          |
| C(13) | 3307(5)  | 3450(2) | 5339(2) | 61(1)          |
| C(14) | 6917(4)  | 5602(1) | 4590(1) | 41(1)          |
| C(15) | 6150(4)  | 6371(1) | 4016(1) | 54(1)          |
| C(16) | 7582(4)  | 4678(1) | 4170(1) | 52(1)          |
| C(17) | 9530(5)  | 4773(2) | 3673(2) | 72(1)          |

Table 3. Bond lengths [Å] and angles [deg] for 4aa.

---

|                 |          |
|-----------------|----------|
| O-C(17)         | 1.185(3) |
| N(1)-C(12)      | 1.138(3) |
| N(2)-C(13)      | 1.141(3) |
| C(1)-C(2)       | 1.389(3) |
| C(1)-C(6)       | 1.408(3) |
| C(1)-C(10)      | 1.500(3) |
| C(2)-C(3)       | 1.369(3) |
| C(2)-H(2)       | 0.9300   |
| C(3)-C(4)       | 1.374(3) |
| C(3)-H(3)       | 0.9300   |
| C(4)-C(5)       | 1.374(3) |
| C(4)-H(4)       | 0.9300   |
| C(5)-C(6)       | 1.397(3) |
| C(5)-H(5)       | 0.9300   |
| C(6)-C(7)       | 1.470(3) |
| C(7)-C(11)      | 1.352(3) |
| C(7)-C(8)       | 1.506(3) |
| C(8)-C(9)       | 1.535(3) |
| C(8)-C(14)      | 1.542(3) |
| C(8)-H(8)       | 0.9800   |
| C(9)-C(10)      | 1.520(3) |
| C(9)-H(9A)      | 0.9700   |
| C(9)-H(9B)      | 0.9700   |
| C(10)-H(10A)    | 0.9700   |
| C(10)-H(10B)    | 0.9700   |
| C(11)-C(13)     | 1.426(3) |
| C(11)-C(12)     | 1.437(3) |
| C(14)-C(16)     | 1.523(3) |
| C(14)-C(15)     | 1.531(3) |
| C(14)-H(14)     | 0.9800   |
| C(15)-H(15A)    | 0.9600   |
| C(15)-H(15B)    | 0.9600   |
| C(15)-H(15C)    | 0.9600   |
| C(16)-C(17)     | 1.473(3) |
| C(16)-H(16A)    | 0.9700   |
| C(16)-H(16B)    | 0.9700   |
| C(17)-H(17)     | 0.9300   |
| <br>            |          |
| C(2)-C(1)-C(6)  | 118.1(2) |
| C(2)-C(1)-C(10) | 120.3(2) |

|                     |            |
|---------------------|------------|
| C(6)-C(1)-C(10)     | 121.6(2)   |
| C(3)-C(2)-C(1)      | 122.0(2)   |
| C(3)-C(2)-H(2)      | 119.0      |
| C(1)-C(2)-H(2)      | 119.0      |
| C(2)-C(3)-C(4)      | 120.1(3)   |
| C(2)-C(3)-H(3)      | 120.0      |
| C(4)-C(3)-H(3)      | 120.0      |
| C(5)-C(4)-C(3)      | 119.5(3)   |
| C(5)-C(4)-H(4)      | 120.3      |
| C(3)-C(4)-H(4)      | 120.3      |
| C(4)-C(5)-C(6)      | 121.4(2)   |
| C(4)-C(5)-H(5)      | 119.3      |
| C(6)-C(5)-H(5)      | 119.3      |
| C(5)-C(6)-C(1)      | 118.9(2)   |
| C(5)-C(6)-C(7)      | 122.34(18) |
| C(1)-C(6)-C(7)      | 118.7(2)   |
| C(11)-C(7)-C(6)     | 123.56(18) |
| C(11)-C(7)-C(8)     | 120.8(2)   |
| C(6)-C(7)-C(8)      | 115.48(18) |
| C(7)-C(8)-C(9)      | 104.77(15) |
| C(7)-C(8)-C(14)     | 112.54(18) |
| C(9)-C(8)-C(14)     | 114.71(17) |
| C(7)-C(8)-H(8)      | 108.2      |
| C(9)-C(8)-H(8)      | 108.2      |
| C(14)-C(8)-H(8)     | 108.2      |
| C(10)-C(9)-C(8)     | 112.5(2)   |
| C(10)-C(9)-H(9A)    | 109.1      |
| C(8)-C(9)-H(9A)     | 109.1      |
| C(10)-C(9)-H(9B)    | 109.1      |
| C(8)-C(9)-H(9B)     | 109.1      |
| H(9A)-C(9)-H(9B)    | 107.8      |
| C(1)-C(10)-C(9)     | 114.35(18) |
| C(1)-C(10)-H(10A)   | 108.7      |
| C(9)-C(10)-H(10A)   | 108.7      |
| C(1)-C(10)-H(10B)   | 108.7      |
| C(9)-C(10)-H(10B)   | 108.7      |
| H(10A)-C(10)-H(10B) | 107.6      |
| C(7)-C(11)-C(13)    | 121.6(2)   |
| C(7)-C(11)-C(12)    | 123.6(2)   |
| C(13)-C(11)-C(12)   | 114.5(2)   |
| N(1)-C(12)-C(11)    | 176.4(3)   |
| N(2)-C(13)-C(11)    | 179.3(3)   |
| C(16)-C(14)-C(15)   | 110.22(16) |
| C(16)-C(14)-C(8)    | 109.78(17) |



|                     |            |
|---------------------|------------|
| C(15)-C(14)-C(8)    | 110.68(18) |
| C(16)-C(14)-H(14)   | 108.7      |
| C(15)-C(14)-H(14)   | 108.7      |
| C(8)-C(14)-H(14)    | 108.7      |
| C(14)-C(15)-H(15A)  | 109.5      |
| C(14)-C(15)-H(15B)  | 109.5      |
| H(15A)-C(15)-H(15B) | 109.5      |
| C(14)-C(15)-H(15C)  | 109.5      |
| H(15A)-C(15)-H(15C) | 109.5      |
| H(15B)-C(15)-H(15C) | 109.5      |
| C(17)-C(16)-C(14)   | 114.94(19) |
| C(17)-C(16)-H(16A)  | 108.5      |
| C(14)-C(16)-H(16A)  | 108.5      |
| C(17)-C(16)-H(16B)  | 108.5      |
| C(14)-C(16)-H(16B)  | 108.5      |
| H(16A)-C(16)-H(16B) | 107.5      |
| O-C(17)-C(16)       | 126.8(3)   |
| O-C(17)-H(17)       | 116.6      |
| C(16)-C(17)-H(17)   | 116.6      |

---

Symmetry transformations used to generate equivalent atoms:

Table 4. Anisotropic displacement parameters ( $\text{\AA}^2 \times 10^3$ ) for 4aa.

The anisotropic displacement factor exponent takes the form:

$$-2 \pi^2 [ h^2 a^{*2} U_{11} + \dots + 2 h k a^* b^* U_{12} ]$$

|       | U11    | U22    | U33    | U23    | U13    | U12    |
|-------|--------|--------|--------|--------|--------|--------|
| O     | 73(1)  | 123(2) | 94(2)  | -11(1) | 27(1)  | -20(2) |
| N(1)  | 131(2) | 67(1)  | 71(1)  | 26(1)  | 9(2)   | -6(2)  |
| N(2)  | 96(2)  | 73(2)  | 108(2) | -4(2)  | -25(2) | -21(2) |
| C(1)  | 69(2)  | 49(1)  | 31(1)  | 1(1)   | 8(1)   | -1(1)  |
| C(2)  | 86(2)  | 68(2)  | 38(1)  | -5(1)  | 9(2)   | -22(2) |
| C(3)  | 72(2)  | 106(2) | 37(1)  | -2(1)  | -1(2)  | -19(2) |
| C(4)  | 61(2)  | 94(2)  | 43(1)  | 12(1)  | -2(1)  | -1(2)  |
| C(5)  | 57(2)  | 62(1)  | 43(1)  | 6(1)   | 1(1)   | 6(2)   |
| C(6)  | 52(1)  | 49(1)  | 30(1)  | 6(1)   | 4(1)   | 1(1)   |
| C(7)  | 48(1)  | 42(1)  | 37(1)  | 1(1)   | 9(1)   | 8(1)   |
| C(8)  | 46(1)  | 42(1)  | 38(1)  | 5(1)   | 1(1)   | 1(1)   |
| C(9)  | 64(2)  | 55(1)  | 48(1)  | 10(1)  | 11(1)  | 17(2)  |
| C(10) | 96(2)  | 49(1)  | 48(1)  | -4(1)  | 11(2)  | 9(2)   |
| C(11) | 58(2)  | 39(1)  | 43(1)  | 4(1)   | 5(1)   | 1(1)   |
| C(12) | 84(2)  | 44(1)  | 54(1)  | 6(1)   | 9(2)   | -4(2)  |
| C(13) | 69(2)  | 47(2)  | 67(2)  | 6(1)   | 3(2)   | -7(1)  |
| C(14) | 44(1)  | 44(1)  | 35(1)  | 1(1)   | -3(1)  | -4(1)  |
| C(15) | 70(2)  | 50(1)  | 42(1)  | 10(1)  | 2(1)   | -7(1)  |
| C(16) | 60(2)  | 52(1)  | 45(1)  | -1(1)  | 3(1)   | -1(1)  |
| C(17) | 75(2)  | 83(2)  | 57(2)  | -11(2) | 19(2)  | 4(2)   |

Table 5. Hydrogen coordinates ( $\times 10^4$ ) and isotropic displacement parameters ( $\text{\AA}^2 \times 10^3$ ) for 4aa.

|        | x     | y    | z    | U(eq) |
|--------|-------|------|------|-------|
| H(2)   | 9057  | 7089 | 7110 | 77    |
| H(3)   | 11558 | 6093 | 7690 | 86    |
| H(4)   | 11684 | 4465 | 7381 | 79    |
| H(5)   | 9125  | 3829 | 6552 | 65    |
| H(8)   | 3859  | 5068 | 4898 | 50    |
| H(9A)  | 3597  | 6720 | 5238 | 67    |
| H(9B)  | 2991  | 6055 | 5937 | 67    |
| H(10A) | 6774  | 7193 | 5759 | 77    |
| H(10B) | 5218  | 7152 | 6474 | 77    |
| H(14)  | 8200  | 5852 | 4867 | 49    |
| H(15A) | 7236  | 6444 | 3620 | 65    |
| H(15B) | 5956  | 6979 | 4276 | 65    |
| H(15C) | 4779  | 6173 | 3792 | 65    |
| H(16A) | 7869  | 4176 | 4547 | 63    |
| H(16B) | 6351  | 4464 | 3859 | 63    |
| H(17)  | 9703  | 4304 | 3294 | 86    |

## Crystal data and structure of enantiopure 4ca

Table 1. Crystal data and structure refinement for 4ca.

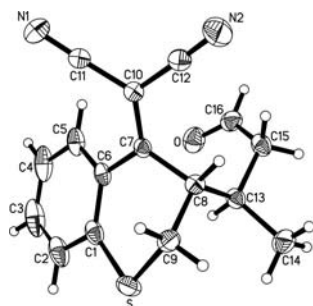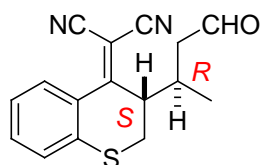

enantiopure **4ca**

|                                 |                                                                                                                   |
|---------------------------------|-------------------------------------------------------------------------------------------------------------------|
| Identification code             | 4ca                                                                                                               |
| Empirical formula               | C <sub>16</sub> H <sub>14</sub> N <sub>2</sub> O S                                                                |
| Formula weight                  | 282.35                                                                                                            |
| Temperature                     | 296(2) K                                                                                                          |
| Wavelength                      | 0.71073 Å                                                                                                         |
| Crystal system                  | Monoclinic                                                                                                        |
| Space group                     | P2(1)                                                                                                             |
| Unit cell dimensions            | a = 7.534(1) Å    alpha = 90 deg.<br>b = 7.610(1) Å    beta = 97.25(1) deg.<br>c = 12.685(1) Å    gamma = 90 deg. |
| Volume, Z                       | 721.52(14) Å <sup>3</sup> , 2                                                                                     |
| Density (calculated)            | 1.300 Mg/m <sup>3</sup>                                                                                           |
| Absorption coefficient          | 0.221 mm <sup>-1</sup>                                                                                            |
| F(000)                          | 296                                                                                                               |
| Crystal size                    | 0.58 x 0.48 x 0.16 mm                                                                                             |
| Theta range for data collection | 1.62 to 27.00 deg.                                                                                                |
| Limiting indices                | -9 ≤ h ≤ 9, -9 ≤ k ≤ 9, -16 ≤ l ≤ 16                                                                              |

|                                   |                                             |
|-----------------------------------|---------------------------------------------|
| Reflections collected             | 3788                                        |
| Independent reflections           | 3158 [R(int) = 0.0126]                      |
| Absorption correction             | Empirical                                   |
| Max. and min. transmission        | 0.9960 and 0.9029                           |
| Refinement method                 | Full-matrix least-squares on F <sup>2</sup> |
| Data / restraints / parameters    | 3158 / 1 / 183                              |
| Goodness-of-fit on F <sup>2</sup> | 1.007                                       |
| Final R indices [I > 2σ(I)]       | R1 = 0.0362, wR2 = 0.0885                   |
| R indices (all data)              | R1 = 0.0472, wR2 = 0.0924                   |
| Absolute structure parameter      | 0.05(8)                                     |
| Extinction coefficient            | 0.035(5)                                    |
| Largest diff. peak and hole       | 0.174 and -0.210 e.Å <sup>-3</sup>          |

Table 2. Atomic coordinates ( $\times 10^4$ ) and equivalent isotropic displacement parameters ( $\text{\AA}^2 \times 10^3$ ) for 4ca.  $U(\text{eq})$  is defined as one third of the trace of the orthogonalized  $U_{ij}$  tensor.

|       | x        | y       | z       | $U(\text{eq})$ |
|-------|----------|---------|---------|----------------|
| S     | 9545(1)  | 1427(1) | 1120(1) | 67(1)          |
| O     | 4373(2)  | 4601(3) | 2096(2) | 75(1)          |
| N(1)  | 5965(4)  | -865(3) | 4971(2) | 96(1)          |
| N(2)  | 9059(4)  | 3726(3) | 5733(2) | 95(1)          |
| C(1)  | 7436(3)  | 723(3)  | 1384(2) | 53(1)          |
| C(2)  | 6423(5)  | -241(3) | 579(2)  | 81(1)          |
| C(3)  | 4759(5)  | -819(4) | 686(3)  | 97(1)          |
| C(4)  | 3998(4)  | -441(3) | 1610(3) | 86(1)          |
| C(5)  | 4960(3)  | 492(3)  | 2405(2) | 60(1)          |
| C(6)  | 6707(2)  | 1068(2) | 2327(1) | 43(1)          |
| C(7)  | 7704(2)  | 2080(2) | 3193(1) | 36(1)          |
| C(8)  | 9050(2)  | 3402(2) | 2906(1) | 38(1)          |
| C(9)  | 10430(3) | 2343(3) | 2388(2) | 51(1)          |
| C(10) | 7516(3)  | 1783(3) | 4232(1) | 46(1)          |
| C(11) | 6599(3)  | 309(3)  | 4615(2) | 62(1)          |
| C(12) | 8391(3)  | 2881(3) | 5060(2) | 59(1)          |
| C(13) | 8233(3)  | 4964(2) | 2237(2) | 44(1)          |
| C(14) | 9699(3)  | 6115(3) | 1873(2) | 69(1)          |
| C(15) | 7023(3)  | 6055(3) | 2870(2) | 53(1)          |
| C(16) | 5088(3)  | 5629(3) | 2725(2) | 59(1)          |

Table 3. Bond lengths [Å] and angles [deg] for 4ca.

---

|                |            |
|----------------|------------|
| S-C(1)         | 1.749(3)   |
| S-C(9)         | 1.802(2)   |
| O-C(16)        | 1.196(3)   |
| N(1)-C(11)     | 1.133(3)   |
| N(2)-C(12)     | 1.134(3)   |
| C(1)-C(2)      | 1.403(3)   |
| C(1)-C(6)      | 1.403(3)   |
| C(2)-C(3)      | 1.351(4)   |
| C(2)-H(2)      | 0.9300     |
| C(3)-C(4)      | 1.398(5)   |
| C(3)-H(3)      | 0.9300     |
| C(4)-C(5)      | 1.365(4)   |
| C(4)-H(4)      | 0.9300     |
| C(5)-C(6)      | 1.402(3)   |
| C(5)-H(5)      | 0.9300     |
| C(6)-C(7)      | 1.468(2)   |
| C(7)-C(10)     | 1.362(2)   |
| C(7)-C(8)      | 1.505(2)   |
| C(8)-C(9)      | 1.528(3)   |
| C(8)-C(13)     | 1.542(2)   |
| C(8)-H(8)      | 0.9800     |
| C(9)-H(9A)     | 0.9700     |
| C(9)-H(9B)     | 0.9700     |
| C(10)-C(11)    | 1.434(3)   |
| C(10)-C(12)    | 1.436(3)   |
| C(13)-C(14)    | 1.526(3)   |
| C(13)-C(15)    | 1.533(3)   |
| C(13)-H(13)    | 0.9800     |
| C(14)-H(14A)   | 0.9600     |
| C(14)-H(14B)   | 0.9600     |
| C(14)-H(14C)   | 0.9600     |
| C(15)-C(16)    | 1.481(3)   |
| C(15)-H(15A)   | 0.9700     |
| C(15)-H(15B)   | 0.9700     |
| C(16)-H(16)    | 0.9300     |
| <br>           |            |
| C(1)-S-C(9)    | 100.97(10) |
| C(2)-C(1)-C(6) | 118.9(2)   |
| C(2)-C(1)-S    | 116.4(2)   |
| C(6)-C(1)-S    | 124.67(16) |

|                     |            |
|---------------------|------------|
| C(3)-C(2)-C(1)      | 121.6(3)   |
| C(3)-C(2)-H(2)      | 119.2      |
| C(1)-C(2)-H(2)      | 119.2      |
| C(2)-C(3)-C(4)      | 120.1(3)   |
| C(2)-C(3)-H(3)      | 120.0      |
| C(4)-C(3)-H(3)      | 120.0      |
| C(5)-C(4)-C(3)      | 119.4(3)   |
| C(5)-C(4)-H(4)      | 120.3      |
| C(3)-C(4)-H(4)      | 120.3      |
| C(4)-C(5)-C(6)      | 121.7(3)   |
| C(4)-C(5)-H(5)      | 119.1      |
| C(6)-C(5)-H(5)      | 119.1      |
| C(5)-C(6)-C(1)      | 118.28(19) |
| C(5)-C(6)-C(7)      | 120.47(17) |
| C(1)-C(6)-C(7)      | 121.18(17) |
| C(10)-C(7)-C(6)     | 122.05(16) |
| C(10)-C(7)-C(8)     | 120.05(16) |
| C(6)-C(7)-C(8)      | 117.80(15) |
| C(7)-C(8)-C(9)      | 105.50(15) |
| C(7)-C(8)-C(13)     | 114.46(14) |
| C(9)-C(8)-C(13)     | 114.58(15) |
| C(7)-C(8)-H(8)      | 107.3      |
| C(9)-C(8)-H(8)      | 107.3      |
| C(13)-C(8)-H(8)     | 107.3      |
| C(8)-C(9)-S         | 113.11(14) |
| C(8)-C(9)-H(9A)     | 109.0      |
| S-C(9)-H(9A)        | 109.0      |
| C(8)-C(9)-H(9B)     | 109.0      |
| S-C(9)-H(9B)        | 109.0      |
| H(9A)-C(9)-H(9B)    | 107.8      |
| C(7)-C(10)-C(11)    | 124.85(17) |
| C(7)-C(10)-C(12)    | 121.13(18) |
| C(11)-C(10)-C(12)   | 113.79(17) |
| N(1)-C(11)-C(10)    | 175.5(3)   |
| N(2)-C(12)-C(10)    | 178.2(3)   |
| C(14)-C(13)-C(15)   | 110.40(17) |
| C(14)-C(13)-C(8)    | 110.83(16) |
| C(15)-C(13)-C(8)    | 110.63(15) |
| C(14)-C(13)-H(13)   | 108.3      |
| C(15)-C(13)-H(13)   | 108.3      |
| C(8)-C(13)-H(13)    | 108.3      |
| C(13)-C(14)-H(14A)  | 109.5      |
| C(13)-C(14)-H(14B)  | 109.5      |
| H(14A)-C(14)-H(14B) | 109.5      |



|                     |            |
|---------------------|------------|
| C(13)-C(14)-H(14C)  | 109.5      |
| H(14A)-C(14)-H(14C) | 109.5      |
| H(14B)-C(14)-H(14C) | 109.5      |
| C(16)-C(15)-C(13)   | 117.25(19) |
| C(16)-C(15)-H(15A)  | 108.0      |
| C(13)-C(15)-H(15A)  | 108.0      |
| C(16)-C(15)-H(15B)  | 108.0      |
| C(13)-C(15)-H(15B)  | 108.0      |
| H(15A)-C(15)-H(15B) | 107.2      |
| O-C(16)-C(15)       | 125.4(2)   |
| O-C(16)-H(16)       | 117.3      |
| C(15)-C(16)-H(16)   | 117.3      |

---

Symmetry transformations used to generate equivalent atoms:

Table 4. Anisotropic displacement parameters ( $\text{\AA}^2 \times 10^3$ ) for 4ca.

The anisotropic displacement factor exponent takes the form:

$$-2 \pi^2 [ h^2 a^{*2} U_{11} + \dots + 2 h k a^* b^* U_{12} ]$$

|       | U11    | U22   | U33    | U23    | U13    | U12    |
|-------|--------|-------|--------|--------|--------|--------|
| S     | 94(1)  | 59(1) | 54(1)  | -2(1)  | 30(1)  | 16(1)  |
| O     | 61(1)  | 67(1) | 98(1)  | 3(1)   | 10(1)  | -5(1)  |
| N(1)  | 136(2) | 72(1) | 93(2)  | 3(1)   | 60(2)  | -27(2) |
| N(2)  | 140(2) | 88(2) | 52(1)  | -13(1) | -1(1)  | -24(2) |
| C(1)  | 76(1)  | 35(1) | 45(1)  | 0(1)   | -7(1)  | 12(1)  |
| C(2)  | 136(3) | 47(1) | 49(1)  | -7(1)  | -23(2) | 11(2)  |
| C(3)  | 122(3) | 50(2) | 99(2)  | -9(2)  | -69(2) | 1(2)   |
| C(4)  | 67(2)  | 43(1) | 133(3) | 1(2)   | -42(2) | -1(1)  |
| C(5)  | 49(1)  | 37(1) | 89(2)  | -3(1)  | -9(1)  | 3(1)   |
| C(6)  | 44(1)  | 30(1) | 52(1)  | -3(1)  | -5(1)  | 6(1)   |
| C(7)  | 36(1)  | 30(1) | 43(1)  | -1(1)  | 6(1)   | 6(1)   |
| C(8)  | 37(1)  | 41(1) | 35(1)  | 2(1)   | 1(1)   | 0(1)   |
| C(9)  | 48(1)  | 46(1) | 60(1)  | 9(1)   | 16(1)  | 7(1)   |
| C(10) | 53(1)  | 40(1) | 46(1)  | -2(1)  | 15(1)  | -2(1)  |
| C(11) | 85(2)  | 51(1) | 57(1)  | -6(1)  | 33(1)  | -6(1)  |
| C(12) | 84(2)  | 54(1) | 41(1)  | -3(1)  | 13(1)  | -10(1) |
| C(13) | 54(1)  | 38(1) | 40(1)  | 1(1)   | 4(1)   | 6(1)   |
| C(14) | 91(2)  | 48(1) | 73(1)  | 17(1)  | 27(1)  | 3(1)   |
| C(15) | 61(1)  | 40(1) | 59(1)  | -2(1)  | 6(1)   | 11(1)  |
| C(16) | 66(1)  | 51(1) | 63(1)  | 12(1)  | 20(1)  | 10(1)  |

Table 5. Hydrogen coordinates ( $\times 10^4$ ) and isotropic displacement parameters ( $\text{\AA}^2 \times 10^3$ ) for 4ca.

|        | x     | y     | z    | U(eq) |
|--------|-------|-------|------|-------|
| H(2)   | 6908  | -489  | -43  | 97    |
| H(3)   | 4119  | -1468 | 144  | 117   |
| H(4)   | 2847  | -822  | 1683 | 103   |
| H(5)   | 4444  | 753   | 3015 | 72    |
| H(8)   | 9659  | 3882  | 3572 | 46    |
| H(9A)  | 10872 | 1396  | 2861 | 61    |
| H(9B)  | 11434 | 3098  | 2293 | 61    |
| H(13)  | 7502  | 4497  | 1606 | 53    |
| H(14A) | 10470 | 6533  | 2481 | 83    |
| H(14B) | 9164  | 7098  | 1478 | 83    |
| H(14C) | 10385 | 5439  | 1429 | 83    |
| H(15A) | 7462  | 5934  | 3618 | 64    |
| H(15B) | 7153  | 7281  | 2684 | 64    |
| H(16)  | 4371  | 6209  | 3160 | 71    |

## Crystal data and structure of racemic 5a

Table 1. Crystal data and structure refinement for 5a.

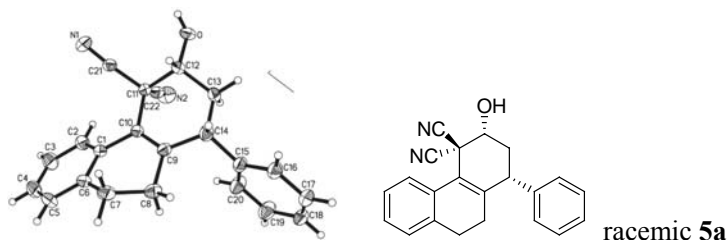

|                                 |                                                                                                                    |
|---------------------------------|--------------------------------------------------------------------------------------------------------------------|
| Identification code             | 5a                                                                                                                 |
| Empirical formula               | C <sub>22</sub> H <sub>18</sub> N <sub>2</sub> O                                                                   |
| Formula weight                  | 326.38                                                                                                             |
| Temperature                     | 296(2) K                                                                                                           |
| Wavelength                      | 0.71073 Å                                                                                                          |
| Crystal system                  | Monoclinic                                                                                                         |
| Space group                     | P2(1)/n                                                                                                            |
| Unit cell dimensions            | a = 15.603(4) Å    alpha = 90 deg.<br>b = 6.159(1) Å    beta = 97.72(2) deg.<br>c = 18.040(4) Å    gamma = 90 deg. |
| Volume, Z                       | 1717.96(73) Å <sup>3</sup> , 4                                                                                     |
| Density (calculated)            | 1.262 Mg/m <sup>3</sup>                                                                                            |
| Absorption coefficient          | 0.078 mm <sup>-1</sup>                                                                                             |
| F(000)                          | 688                                                                                                                |
| Crystal size                    | 0.60 x 0.42 x 0.24 mm                                                                                              |
| Theta range for data collection | 1.62 to 25.49 deg.                                                                                                 |
| Limiting indices                | 0 ≤ h ≤ 18, 0 ≤ k ≤ 7, -21 ≤ l ≤ 21                                                                                |
| Reflections collected           | 3776                                                                                                               |

|                                   |                                             |
|-----------------------------------|---------------------------------------------|
| Independent reflections           | 3203 [R(int) = 0.0250]                      |
| Absorption correction             | None                                        |
| Refinement method                 | Full-matrix least-squares on F <sup>2</sup> |
| Data / restraints / parameters    | 3203 / 0 / 228                              |
| Goodness-of-fit on F <sup>2</sup> | 0.966                                       |
| Final R indices [I>2sigma(I)]     | R1 = 0.0448, wR2 = 0.0936                   |
| R indices (all data)              | R1 = 0.0815, wR2 = 0.1033                   |
| Extinction coefficient            | 0.0204(15)                                  |
| Largest diff. peak and hole       | 0.174 and -0.143 e.A <sup>-3</sup>          |

Table 2. Atomic coordinates ( $\times 10^4$ ) and equivalent isotropic displacement parameters ( $\text{\AA}^2 \times 10^3$ ) for 5a.  $U(\text{eq})$  is defined as one third of the trace of the orthogonalized  $U_{ij}$  tensor.

|       | x       | y        | z       | $U(\text{eq})$ |
|-------|---------|----------|---------|----------------|
| O     | 4640(1) | 6747(3)  | 5818(1) | 56(1)          |
| N(1)  | 4423(1) | 8848(3)  | 3962(1) | 59(1)          |
| N(2)  | 3433(1) | 2927(4)  | 4759(1) | 69(1)          |
| C(1)  | 2061(1) | 8175(3)  | 3908(1) | 39(1)          |
| C(2)  | 2270(1) | 6854(4)  | 3341(1) | 51(1)          |
| C(3)  | 1849(2) | 7031(5)  | 2618(1) | 67(1)          |
| C(4)  | 1213(2) | 8550(5)  | 2463(1) | 74(1)          |
| C(5)  | 991(1)  | 9883(5)  | 3015(1) | 68(1)          |
| C(6)  | 1403(1) | 9722(4)  | 3745(1) | 49(1)          |
| C(7)  | 1162(1) | 11083(4) | 4374(1) | 59(1)          |
| C(8)  | 1185(1) | 9704(4)  | 5074(1) | 55(1)          |
| C(9)  | 2058(1) | 8618(3)  | 5258(1) | 37(1)          |
| C(10) | 2479(1) | 8005(3)  | 4694(1) | 32(1)          |
| C(11) | 3412(1) | 7149(3)  | 4850(1) | 34(1)          |
| C(12) | 3833(1) | 7785(3)  | 5653(1) | 39(1)          |
| C(13) | 3237(1) | 7083(4)  | 6199(1) | 45(1)          |
| C(14) | 2393(1) | 8358(3)  | 6078(1) | 43(1)          |
| C(15) | 1729(1) | 7315(3)  | 6515(1) | 43(1)          |
| C(16) | 1594(1) | 8115(4)  | 7203(1) | 51(1)          |
| C(17) | 1017(1) | 7137(4)  | 7617(1) | 57(1)          |
| C(18) | 568(1)  | 5352(4)  | 7342(1) | 59(1)          |
| C(19) | 692(2)  | 4517(4)  | 6659(1) | 66(1)          |
| C(20) | 1274(1) | 5492(4)  | 6251(1) | 59(1)          |
| C(21) | 3961(1) | 8079(3)  | 4322(1) | 38(1)          |
| C(22) | 3432(1) | 4761(4)  | 4786(1) | 43(1)          |

Table 3. Bond lengths [Å] and angles [deg] for 5a.

---

|              |          |
|--------------|----------|
| O-C(12)      | 1.408(2) |
| O-H(0)       | 0.8200   |
| N(1)-C(21)   | 1.137(2) |
| N(2)-C(22)   | 1.131(3) |
| C(1)-C(2)    | 1.380(3) |
| C(1)-C(6)    | 1.403(3) |
| C(1)-C(10)   | 1.482(2) |
| C(2)-C(3)    | 1.384(3) |
| C(2)-H(2)    | 0.9300   |
| C(3)-C(4)    | 1.365(3) |
| C(3)-H(3)    | 0.9300   |
| C(4)-C(5)    | 1.372(3) |
| C(4)-H(4)    | 0.9300   |
| C(5)-C(6)    | 1.389(3) |
| C(5)-H(5)    | 0.9300   |
| C(6)-C(7)    | 1.498(3) |
| C(7)-C(8)    | 1.518(3) |
| C(7)-H(7A)   | 0.9700   |
| C(7)-H(7B)   | 0.9700   |
| C(8)-C(9)    | 1.513(3) |
| C(8)-H(8A)   | 0.9700   |
| C(8)-H(8B)   | 0.9700   |
| C(9)-C(10)   | 1.337(2) |
| C(9)-C(14)   | 1.510(3) |
| C(10)-C(11)  | 1.538(2) |
| C(11)-C(22)  | 1.476(3) |
| C(11)-C(21)  | 1.480(2) |
| C(11)-C(12)  | 1.558(2) |
| C(12)-C(13)  | 1.506(2) |
| C(12)-H(12)  | 0.9800   |
| C(13)-C(14)  | 1.524(3) |
| C(13)-H(13A) | 0.9700   |
| C(13)-H(13B) | 0.9700   |
| C(14)-C(15)  | 1.526(2) |
| C(14)-H(14)  | 0.9800   |
| C(15)-C(16)  | 1.377(3) |
| C(15)-C(20)  | 1.379(3) |
| C(16)-C(17)  | 1.383(3) |
| C(16)-H(16)  | 0.9300   |
| C(17)-C(18)  | 1.360(3) |

|                  |            |
|------------------|------------|
| C(17)-H(17)      | 0.9300     |
| C(18)-C(19)      | 1.374(3)   |
| C(18)-H(18)      | 0.9300     |
| C(19)-C(20)      | 1.380(3)   |
| C(19)-H(19)      | 0.9300     |
| C(20)-H(20)      | 0.9300     |
|                  |            |
| C(12)-O-H(0)     | 109.5      |
| C(2)-C(1)-C(6)   | 118.96(18) |
| C(2)-C(1)-C(10)  | 123.40(18) |
| C(6)-C(1)-C(10)  | 117.61(18) |
| C(1)-C(2)-C(3)   | 121.5(2)   |
| C(1)-C(2)-H(2)   | 119.2      |
| C(3)-C(2)-H(2)   | 119.2      |
| C(4)-C(3)-C(2)   | 119.2(2)   |
| C(4)-C(3)-H(3)   | 120.4      |
| C(2)-C(3)-H(3)   | 120.4      |
| C(3)-C(4)-C(5)   | 120.6(2)   |
| C(3)-C(4)-H(4)   | 119.7      |
| C(5)-C(4)-H(4)   | 119.7      |
| C(4)-C(5)-C(6)   | 121.1(2)   |
| C(4)-C(5)-H(5)   | 119.5      |
| C(6)-C(5)-H(5)   | 119.5      |
| C(5)-C(6)-C(1)   | 118.7(2)   |
| C(5)-C(6)-C(7)   | 123.1(2)   |
| C(1)-C(6)-C(7)   | 118.20(17) |
| C(6)-C(7)-C(8)   | 109.67(19) |
| C(6)-C(7)-H(7A)  | 109.7      |
| C(8)-C(7)-H(7A)  | 109.7      |
| C(6)-C(7)-H(7B)  | 109.7      |
| C(8)-C(7)-H(7B)  | 109.7      |
| H(7A)-C(7)-H(7B) | 108.2      |
| C(9)-C(8)-C(7)   | 110.47(16) |
| C(9)-C(8)-H(8A)  | 109.6      |
| C(7)-C(8)-H(8A)  | 109.6      |
| C(9)-C(8)-H(8B)  | 109.6      |
| C(7)-C(8)-H(8B)  | 109.6      |
| H(8A)-C(8)-H(8B) | 108.1      |
| C(10)-C(9)-C(14) | 125.07(16) |
| C(10)-C(9)-C(8)  | 118.51(17) |
| C(14)-C(9)-C(8)  | 116.40(16) |
| C(9)-C(10)-C(1)  | 120.66(16) |
| C(9)-C(10)-C(11) | 120.48(16) |
| C(1)-C(10)-C(11) | 118.86(15) |



|                     |            |
|---------------------|------------|
| C(22)-C(11)-C(21)   | 108.39(16) |
| C(22)-C(11)-C(10)   | 110.88(16) |
| C(21)-C(11)-C(10)   | 111.45(15) |
| C(22)-C(11)-C(12)   | 108.18(16) |
| C(21)-C(11)-C(12)   | 107.01(15) |
| C(10)-C(11)-C(12)   | 110.77(14) |
| O-C(12)-C(13)       | 110.18(15) |
| O-C(12)-C(11)       | 109.65(15) |
| C(13)-C(12)-C(11)   | 108.35(15) |
| O-C(12)-H(12)       | 109.5      |
| C(13)-C(12)-H(12)   | 109.5      |
| C(11)-C(12)-H(12)   | 109.5      |
| C(12)-C(13)-C(14)   | 110.90(16) |
| C(12)-C(13)-H(13A)  | 109.5      |
| C(14)-C(13)-H(13A)  | 109.5      |
| C(12)-C(13)-H(13B)  | 109.5      |
| C(14)-C(13)-H(13B)  | 109.5      |
| H(13A)-C(13)-H(13B) | 108.0      |
| C(9)-C(14)-C(13)    | 111.89(15) |
| C(9)-C(14)-C(15)    | 112.40(16) |
| C(13)-C(14)-C(15)   | 110.07(16) |
| C(9)-C(14)-H(14)    | 107.4      |
| C(13)-C(14)-H(14)   | 107.4      |
| C(15)-C(14)-H(14)   | 107.4      |
| C(16)-C(15)-C(20)   | 117.97(19) |
| C(16)-C(15)-C(14)   | 120.76(19) |
| C(20)-C(15)-C(14)   | 121.20(18) |
| C(15)-C(16)-C(17)   | 121.3(2)   |
| C(15)-C(16)-H(16)   | 119.3      |
| C(17)-C(16)-H(16)   | 119.3      |
| C(18)-C(17)-C(16)   | 119.7(2)   |
| C(18)-C(17)-H(17)   | 120.2      |
| C(16)-C(17)-H(17)   | 120.2      |
| C(17)-C(18)-C(19)   | 120.2(2)   |
| C(17)-C(18)-H(18)   | 119.9      |
| C(19)-C(18)-H(18)   | 119.9      |
| C(18)-C(19)-C(20)   | 119.8(2)   |
| C(18)-C(19)-H(19)   | 120.1      |
| C(20)-C(19)-H(19)   | 120.1      |
| C(15)-C(20)-C(19)   | 121.0(2)   |
| C(15)-C(20)-H(20)   | 119.5      |
| C(19)-C(20)-H(20)   | 119.5      |
| N(1)-C(21)-C(11)    | 174.9(2)   |
| N(2)-C(22)-C(11)    | 177.6(2)   |

---

Symmetry transformations used to generate equivalent atoms:

Table 4. Anisotropic displacement parameters ( $\text{\AA}^2 \times 10^3$ ) for 5a.

The anisotropic displacement factor exponent takes the form:

$$-2 \pi^2 [ h^2 a^{*2} U_{11} + \dots + 2 h k a^* b^* U_{12} ]$$

|       | U11   | U22    | U33   | U23    | U13    | U12    |
|-------|-------|--------|-------|--------|--------|--------|
| O     | 31(1) | 74(1)  | 60(1) | 17(1)  | -6(1)  | -1(1)  |
| N(1)  | 47(1) | 76(1)  | 55(1) | 8(1)   | 18(1)  | -9(1)  |
| N(2)  | 67(1) | 47(1)  | 93(2) | -1(1)  | 13(1)  | 3(1)   |
| C(1)  | 30(1) | 49(1)  | 37(1) | 6(1)   | 2(1)   | -4(1)  |
| C(2)  | 47(1) | 69(2)  | 38(1) | -1(1)  | 1(1)   | -3(1)  |
| C(3)  | 68(2) | 92(2)  | 39(1) | -5(1)  | -5(1)  | -14(2) |
| C(4)  | 60(2) | 114(2) | 43(1) | 17(2)  | -16(1) | -18(2) |
| C(5)  | 41(1) | 93(2)  | 65(2) | 30(2)  | -10(1) | 4(1)   |
| C(6)  | 29(1) | 65(2)  | 52(1) | 17(1)  | 2(1)   | 2(1)   |
| C(7)  | 39(1) | 67(2)  | 73(2) | 18(1)  | 13(1)  | 20(1)  |
| C(8)  | 40(1) | 68(2)  | 60(1) | 6(1)   | 17(1)  | 14(1)  |
| C(9)  | 33(1) | 41(1)  | 39(1) | 1(1)   | 9(1)   | 1(1)   |
| C(10) | 27(1) | 35(1)  | 35(1) | 2(1)   | 3(1)   | 1(1)   |
| C(11) | 30(1) | 38(1)  | 34(1) | 3(1)   | 5(1)   | 0(1)   |
| C(12) | 31(1) | 47(1)  | 38(1) | 5(1)   | -1(1)  | -3(1)  |
| C(13) | 45(1) | 57(1)  | 30(1) | 5(1)   | -1(1)  | -7(1)  |
| C(14) | 47(1) | 45(1)  | 37(1) | -5(1)  | 10(1)  | -6(1)  |
| C(15) | 45(1) | 48(1)  | 37(1) | 0(1)   | 12(1)  | -1(1)  |
| C(16) | 50(1) | 64(2)  | 39(1) | -5(1)  | 12(1)  | -4(1)  |
| C(17) | 53(1) | 78(2)  | 43(1) | 0(1)   | 17(1)  | 3(1)   |
| C(18) | 47(1) | 77(2)  | 55(1) | 19(1)  | 19(1)  | 2(1)   |
| C(19) | 68(2) | 66(2)  | 68(2) | -1(1)  | 21(1)  | -19(1) |
| C(20) | 70(2) | 62(2)  | 51(1) | -11(1) | 25(1)  | -17(1) |
| C(21) | 30(1) | 45(1)  | 39(1) | 0(1)   | 4(1)   | 3(1)   |
| C(22) | 31(1) | 49(2)  | 49(1) | 2(1)   | 7(1)   | 3(1)   |

Table 5. Hydrogen coordinates ( $\times 10^4$ ) and isotropic displacement parameters ( $\text{\AA}^2 \times 10^3$ ) for 5a.

|        | x    | y     | z    | U(eq) |
|--------|------|-------|------|-------|
| H(0)   | 5028 | 7615  | 5771 | 67    |
| H(2)   | 2705 | 5822  | 3447 | 62    |
| H(3)   | 1996 | 6126  | 2242 | 81    |
| H(4)   | 927  | 8682  | 1978 | 89    |
| H(5)   | 557  | 10912 | 2900 | 82    |
| H(7A)  | 587  | 11675 | 4238 | 71    |
| H(7B)  | 1564 | 12283 | 4468 | 71    |
| H(8A)  | 1073 | 10611 | 5490 | 66    |
| H(8B)  | 736  | 8607  | 4997 | 66    |
| H(12)  | 3913 | 9362  | 5683 | 47    |
| H(13A) | 3518 | 7310  | 6705 | 53    |
| H(13B) | 3114 | 5545  | 6135 | 53    |
| H(14)  | 2514 | 9815  | 6284 | 51    |
| H(16)  | 1897 | 9338  | 7393 | 61    |
| H(17)  | 935  | 7698  | 8081 | 68    |
| H(18)  | 177  | 4696  | 7618 | 70    |
| H(19)  | 384  | 3299  | 6471 | 79    |
| H(20)  | 1361 | 4910  | 5791 | 71    |

H-bond:

O H0 N1 0.82 2.37 3.082(2) 146.2 3\_676
